# Supplementary material for: Creating and analyzing pathway and protein interaction compendia for modelling signal transduction networks
Source: PubMed Central journal article supplement (PMC3436686; doi:10.1186/1752-0509-6-29), 2012-05-01

S1Ai

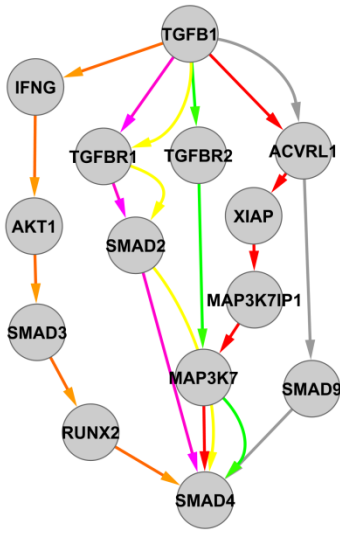

S1Aii

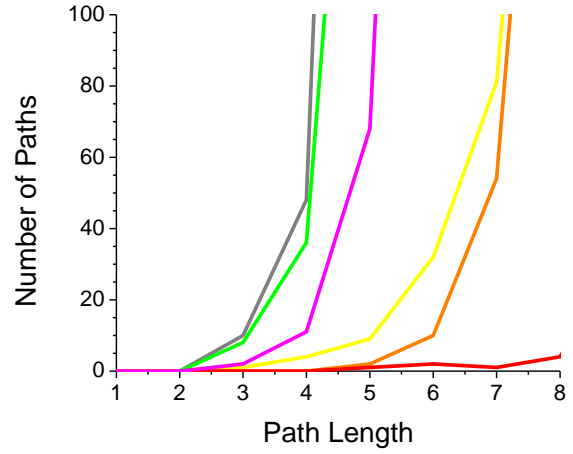

S1Bi

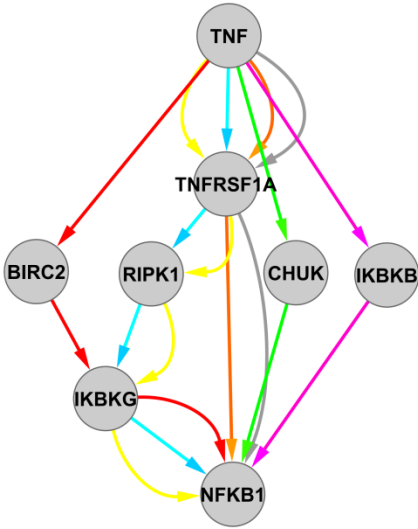

S1Bii

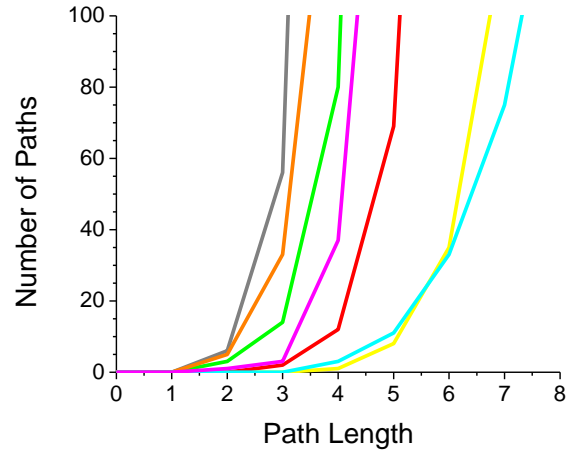

S1Ci

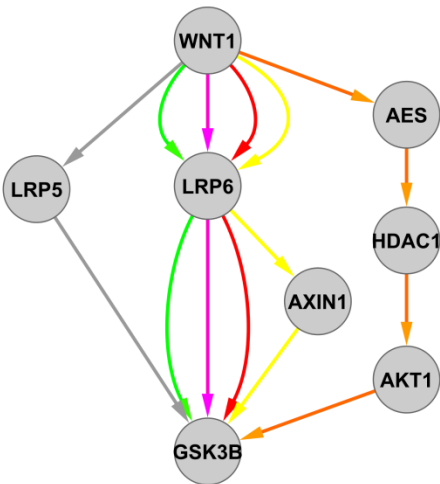

S1Cii

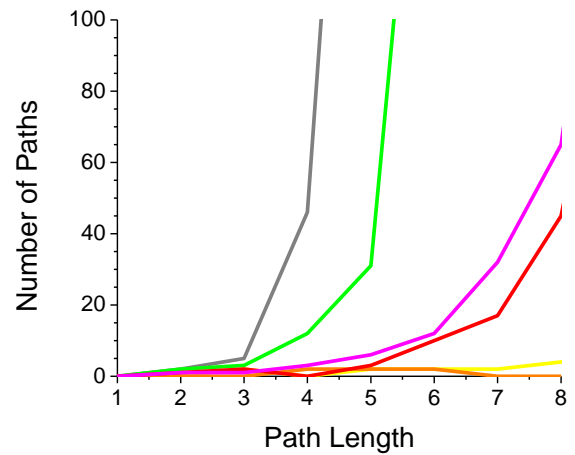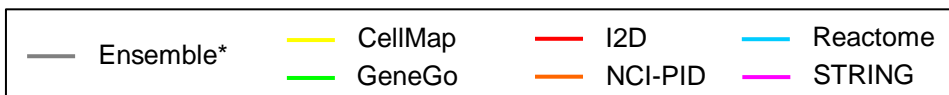

Supplement: 1752-0509-6-29-S1.pdf [file 1752-0509-6-29-S1.pdf]
